# Supplementary material
Source: MDPI journal article supplement (https://www.mdpi.com/2227-7102/14/1/94)
Supplement: s1 [file s1]

## Supporting Information

The assessments presented in this manuscript are available in the BioMolViz Library at [library.biomolviz.org](http://library.biomolviz.org). The assessment IDs presented here are the last two digits of the Library ID, and each ID is preceded by the numbers 100 (e.g., the item 13 Library ID = 10013). Items are reviewed and modified as needed after each phase of our assessment design and validation process; therefore, some items may appear differently in the Library than they are presented in this manuscript.

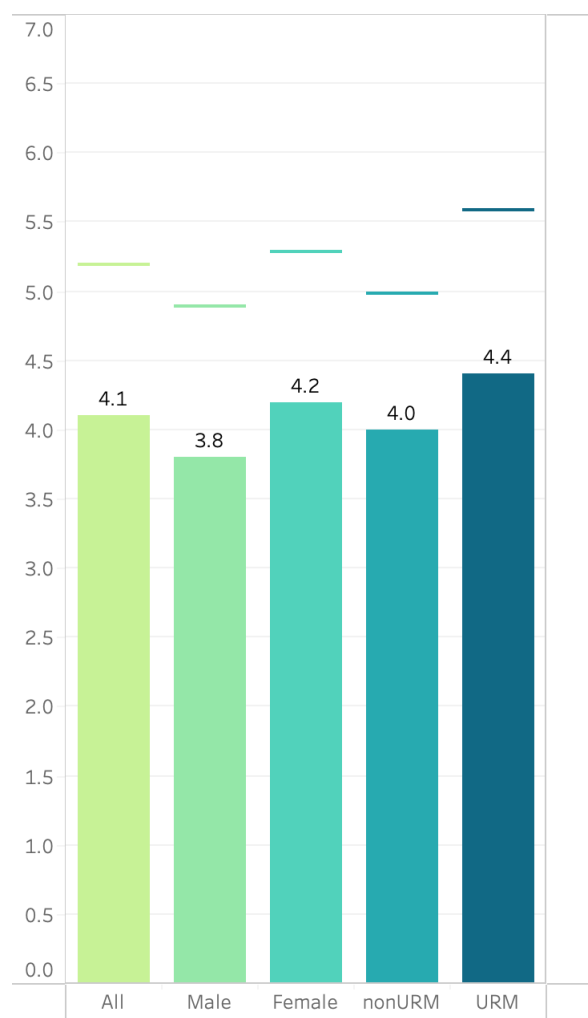

**Figure S1.** Performance data disaggregated by gender and race/ethnicity.

**Table S1.** Descriptive and inferential statistics, gender differences in performance (% correct) for students only for all items.

|          |    | Males |      | Females |      | Independent Samples t-Test  |
|----------|----|-------|------|---------|------|-----------------------------|
|          |    | Mean  | SD   | Mean    | SD   |                             |
| Students | 00 | 0.81  | 0.25 | 0.83    | 0.22 | ns                          |
|          | 01 | 0.62  | 0.49 | 0.60    | 0.49 | ns                          |
|          | 02 | 0.05  | 0.22 | 0.13    | 0.34 | ns                          |
|          | 03 | 0.71  | 0.46 | 0.94    | 0.25 | $t(25) = -2.07, p < 0.05 *$ |
|          | 04 | 0.82  | 0.28 | 0.77    | 0.32 | ns                          |
|          | 06 | 0.69  | 0.48 | 0.31    | 0.47 | $t(21) = 2.44, p < 0.05 *$  |
|          | 09 | 0.33  | 0.48 | 0.35    | 0.48 | ns                          |
|          | 10 | 0.61  | 0.39 | 0.33    | 0.32 | $t(33) = 2.73, p < 0.05 *$  |
|          | 11 | 0.46  | 0.52 | 0.43    | 0.50 | ns                          |
|          | 12 | 0.77  | 0.44 | 0.46    | 0.51 | $t(25) = 2.10, p < 0.05 *$  |
|          | 13 | 0.33  | 0.48 | 0.47    | 0.50 | ns                          |

|                          |      |      |             |      |    |
|--------------------------|------|------|-------------|------|----|
| 14                       | 0.56 | 0.50 | 0.45        | 0.50 | ns |
| 15                       | 0.46 | 0.52 | 0.51        | 0.51 | ns |
| 16                       | 0.60 | 0.50 | 0.44        | 0.50 | ns |
| <b>Overall % Correct</b> | 0.55 | 0.25 | <b>0.50</b> | 0.22 | ns |

Scale: 0.00–1.00 (% correct). \*\*  $p < 0.01$ ; \*  $p < 0.05$ ,  $\pm p < 0.10$  (approaching significance). ns = not significant.

**Table S2.** Descriptive and inferential statistics, race/ethnicity differences in performance (% correct) for students only for all items.

|          |                          | nonURM |      | URM  |      | Independent Samples t-Test  |
|----------|--------------------------|--------|------|------|------|-----------------------------|
|          |                          | Mean   | SD   | Mean | SD   |                             |
| Students | 00                       | 0.81   | 0.25 | 0.85 | 0.17 | ns                          |
|          | 01                       | 0.61   | 0.49 | 0.60 | 0.50 | ns                          |
|          | 02                       | 0.14   | 0.35 | 0.00 | 0.00 | $t(50) = 2.82, p < 0.01$ ** |
|          | 03                       | 0.88   | 0.33 | 0.86 | 0.36 | ns                          |
|          | 04                       | 0.80   | 0.28 | 0.67 | 0.40 | ns                          |
|          | 06                       | 0.41   | 0.50 | 0.44 | 0.51 | ns                          |
|          | 09                       | 0.34   | 0.48 | 0.45 | 0.51 | ns                          |
|          | 10                       | 0.49   | 0.38 | 0.24 | 0.24 | $t(30) = 2.85, p < 0.01$ ** |
|          | 11                       | 0.41   | 0.50 | 0.56 | 0.51 | ns                          |
|          | 12                       | 0.56   | 0.50 | 0.50 | 0.52 | ns                          |
|          | 13                       | 0.39   | 0.49 | 0.50 | 0.52 | ns                          |
|          | 14                       | 0.49   | 0.50 | 0.48 | 0.51 | ns                          |
|          | 15                       | 0.56   | 0.50 | 0.44 | 0.51 | ns                          |
|          | 16                       | 0.58   | 0.50 | 0.23 | 0.44 | $t(21) = 2.50, p < 0.05$ *  |
|          | <b>Overall % Correct</b> | 0.53   | 0.24 | 0.49 | 0.20 | ns                          |

Scale: 0.00–1.00 (% correct). \*\*  $p < 0.01$ ; \*  $p < 0.05$ ,  $\pm p < 0.10$  (approaching significance). ns = not significant.

**Table S3.** Descriptive and inferential statistics, difficulty perceptions and mean comparison between instructors and students.

| Assessment ID#                              | Students    |             | Instructors |             | Independent Samples t-Test                       | Mean Comparison |
|---------------------------------------------|-------------|-------------|-------------|-------------|--------------------------------------------------|-----------------|
|                                             | Mean        | SD          | Mean        | SD          |                                                  |                 |
| 00                                          | 4.23        | 1.19        | 4.30        | 1.41        | $t(43) = -0.21, ns$                              | -0.07           |
| 01                                          | 4.62        | 1.40        | 2.59        | 1.25        | $t(42) = 7.44, p < 0.01$ **                      | 2.03            |
| 02                                          | 2.31        | 1.46        | 3.81        | 1.14        | $t(60) = -5.34, p < 0.01$ **                     | -1.50           |
| 03                                          | 3.27        | 1.34        | 2.59        | 1.47        | $t(44) = 2.08, p < 0.05$ *                       | 0.68            |
| 04                                          | 3.39        | 1.54        | 3.85        | 1.46        | $t(50) = -1.39, ns$                              | -0.46           |
| 06                                          | 3.88        | 1.64        | 3.56        | 1.48        | $t(58) = 0.89, ns$                               | 0.32            |
| 09                                          | 4.70        | 1.29        | 3.00        | 1.33        | $t(39) = 6.00, p < 0.01$ **                      | 1.70            |
| 10                                          | 5.23        | 1.71        | 3.19        | 1.27        | $t(66) = 6.23, p < 0.01$ **                      | 2.04            |
| 11                                          | 4.66        | 1.61        | 4.00        | 1.30        | $t(64) = 1.95, p = 0.056 \pm$                    | 0.66            |
| 12                                          | 3.51        | 1.72        | 2.22        | 1.19        | $t(70) = 3.84, p < 0.01$ **                      | 1.29            |
| 13                                          | 3.78        | 1.40        | 4.15        | 1.79        | $t(39) = -0.97, ns$                              | -0.37           |
| 14                                          | 4.22        | 1.54        | 2.63        | 0.93        | $t(60) = 7.14, p < 0.01$ **                      | 1.59            |
| 15                                          | 4.72        | 1.76        | 4.07        | 1.47        | $t(62) = 1.72, p = 0.091 \pm$                    | 0.65            |
| 16                                          | 3.72        | 1.44        | 2.48        | 1.40        | $t(51) = 3.80, p < 0.01$ **                      | 1.24            |
| <b>Overall Perceived Difficulty Average</b> | <b>4.08</b> | <b>1.09</b> | <b>3.32</b> | <b>0.69</b> | <b><math>t(48) = 4.94, p &lt; 0.01</math> **</b> | <b>0.76</b>     |

A negative value indicates that the students perceive it is easier. Scale: 1, very easy to 7, very difficult.

\*\*  $p < 0.01$ ; \*  $p < 0.05$ ,  $\pm p < 0.10$  (approaching significance). ns = not significant.

**Table S4.** Descriptive and inferential statistics, gender differences in difficulty perceptions for instructors and students.

|             |                                             | Male        |             | Female      |             | Independent Samples t-Test                       |
|-------------|---------------------------------------------|-------------|-------------|-------------|-------------|--------------------------------------------------|
|             |                                             | Mean        | SD          | Mean        | SD          |                                                  |
| Instructors | 00                                          | 3.80        | 1.03        | 4.59        | 1.54        | ns                                               |
|             | 01                                          | 2.50        | 1.08        | 2.65        | 1.37        | ns                                               |
|             | 02                                          | 4.10        | 1.37        | 3.65        | 1.00        | ns                                               |
|             | 03                                          | 2.60        | 1.43        | 2.59        | 1.54        | ns                                               |
|             | 04                                          | 4.10        | 1.10        | 3.71        | 1.65        | ns                                               |
|             | 06                                          | 3.50        | 1.51        | 3.59        | 1.50        | ns                                               |
|             | 09                                          | 3.20        | 1.55        | 2.88        | 1.22        | ns                                               |
|             | 10                                          | 3.20        | 1.14        | 3.18        | 1.38        | ns                                               |
|             | 11                                          | 4.00        | 1.63        | 4.00        | 1.12        | ns                                               |
|             | 12                                          | 2.40        | 1.26        | 2.12        | 1.17        | ns                                               |
|             | 13                                          | 4.20        | 1.62        | 4.12        | 1.93        | ns                                               |
|             | 14                                          | 2.80        | 0.63        | 2.53        | 1.07        | ns                                               |
|             | 15                                          | 4.60        | 1.43        | 3.76        | 1.44        | ns                                               |
|             | 16                                          | 2.60        | 1.71        | 2.41        | 1.23        | ns                                               |
|             | <b>Overall Perceived Difficulty Average</b> | <b>3.40</b> | <b>0.65</b> | <b>3.27</b> | <b>0.72</b> | <b>ns</b>                                        |
| Students    | 00                                          | 4.05        | 1.43        | 4.31        | 1.08        | ns                                               |
|             | 01                                          | 4.09        | 1.38        | 4.89        | 1.33        | t(60) = -2.88, $p < 0.01$ **                     |
|             | 02                                          | 2.19        | 1.54        | 2.40        | 1.45        | ns                                               |
|             | 03                                          | 3.52        | 1.50        | 3.17        | 1.27        | ns                                               |
|             | 04                                          | 3.48        | 1.97        | 3.36        | 1.31        | ns                                               |
|             | 06                                          | 3.23        | 1.17        | 4.14        | 1.77        | t(33) = -2.07, $p < 0.05$ *                      |
|             | 09                                          | 4.55        | 1.25        | 4.77        | 1.34        | ns                                               |
|             | 10                                          | 4.70        | 1.92        | 5.51        | 1.57        | ns                                               |
|             | 11                                          | 4.23        | 1.59        | 4.80        | 1.66        | ns                                               |
|             | 12                                          | 2.77        | 1.17        | 3.79        | 1.84        | t(34) = -2.27, $p < 0.05$ *                      |
|             | 13                                          | 4.00        | 1.69        | 3.76        | 1.25        | ns                                               |
|             | 14                                          | 4.15        | 1.85        | 4.34        | 1.34        | ns                                               |
|             | 15                                          | 4.15        | 1.68        | 4.86        | 1.78        | ns                                               |
|             | 16                                          | 3.25        | 1.55        | 4.00        | 1.36        | t(34) = -1.83, $p < 0.10$ ±                      |
|             | <b>Overall Perceived Difficulty Average</b> | <b>3.84</b> | <b>1.12</b> | <b>4.21</b> | <b>1.06</b> | <b>t(97) = -2.09, <math>p &lt; 0.05</math> *</b> |

Scale: 1, very easy to 7, very difficult. \*\*  $p < 0.01$ ; \*  $p < 0.05$ , ±  $p < 0.10$  (approaching significance). Ns = not significant. Due to the limited number of instructors who identified as URM ( $n < 5$ ), meaningful distinctions between URM and non-URM instructors could not be reliably interpreted.

**Table S5.** Descriptive and inferential statistics, race/ethnicity differences in difficulty perceptions for students only for all items.

|          |                                             | nonURM      |             | URM         |      | Independent Samples t-Test                       |
|----------|---------------------------------------------|-------------|-------------|-------------|------|--------------------------------------------------|
|          |                                             | Mean        | SD          | Mean        | SD   |                                                  |
| Students | 00                                          | 4.35        | 1.16        | 3.77        | 1.24 | ns                                               |
|          | 01                                          | 4.47        | 1.32        | 4.93        | 1.57 | ns                                               |
|          | 02                                          | 2.18        | 1.23        | 3.00        | 2.15 | ns                                               |
|          | 03                                          | 3.12        | 1.21        | 3.57        | 1.65 | ns                                               |
|          | 04                                          | 3.25        | 1.26        | 3.71        | 2.13 | ns                                               |
|          | 06                                          | 3.50        | 1.52        | 4.50        | 1.75 | t(27) = -1.95, $p < 0.10$ ±                      |
|          | 09                                          | 4.65        | 1.21        | 4.76        | 1.48 | ns                                               |
|          | 10                                          | 5.25        | 1.71        | 5.15        | 1.77 | ns                                               |
|          | 11                                          | 4.25        | 1.70        | 5.44        | 1.21 | t(40) = -2.78, $p < 0.01$ **                     |
|          | 12                                          | 3.44        | 1.72        | 3.40        | 1.72 | ns                                               |
|          | 13                                          | 3.69        | 1.36        | 4.14        | 1.46 | ns                                               |
|          | 14                                          | 4.24        | 1.51        | 4.33        | 1.66 | ns                                               |
|          | 15                                          | 4.38        | 1.86        | 5.31        | 1.49 | t(37) = -1.88, $p < 0.10$ ±                      |
|          | 16                                          | 3.73        | 1.44        | 3.69        | 1.49 | ns                                               |
|          | <b>Overall Perceived Difficulty Average</b> | <b>4.00</b> | <b>1.04</b> | <b>4.35</b> |      | <b>t(65) = -1.76, <math>p &lt; 0.10</math> ±</b> |

Scale: 1, very easy to 7, very difficult. \*\*  $p < 0.01$ ; \*  $p < 0.05$ , ±  $p < 0.10$  (approaching significance). Ns = not significant.
